# Supplementary material for: Gene Expression Profiling Reveals Fundamental Sex-Specific Differences in SIRT3-Mediated Redox and Metabolic Signaling in Mouse Embryonic Fibroblasts
Source: MDPI journal article supplement (doi:10.3390/ijms25073868), 2024-03-30
Supplement: s1 [file s1]

## SUPPLEMENTARY FILE

### Gene expression profiling reveals fundamental sex-specific differences in SIRT3-mediated redox and metabolic signaling in mouse embryonic fibroblasts

Robert Belužić<sup>1\*#</sup>, Ena Šimunić<sup>1#</sup>, Iva I. Podgorski<sup>1</sup>, Marija Pinterić<sup>1</sup>, Marijana Popović Hadžija<sup>1</sup>, Tihomir Balog<sup>1</sup>, Sandra Sobočanec<sup>1</sup>

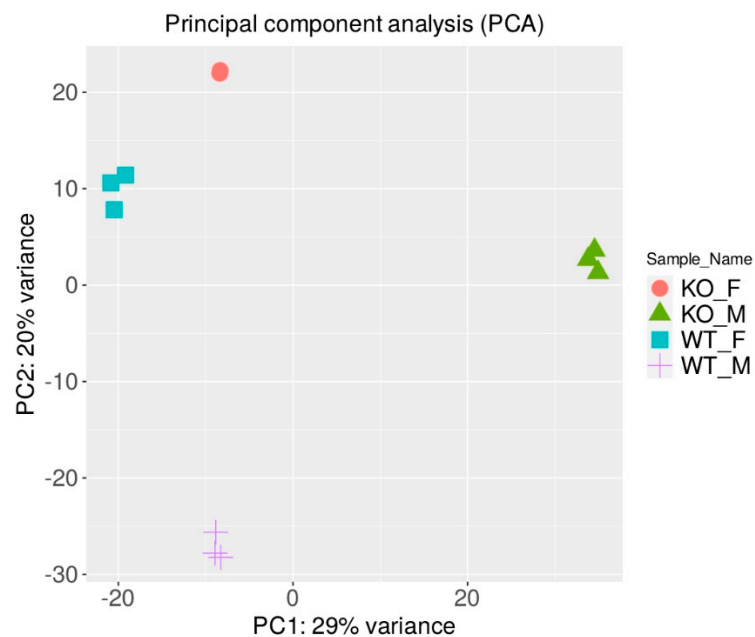

**Figure S1.** Principal component analysis was performed using IDEP (1) with TPM matrix as input. KO - knockout; WT – wild type; M - male; F-female.

**Table S1.** TPM values of main ISR regulators and effectors.

|            | TPM (WT_M) | TPM (KO_M) | P <sub>adj_males</sub> | TPM (WT_F) | TPM (KO_F) | P <sub>adj_females</sub> |
|------------|------------|------------|------------------------|------------|------------|--------------------------|
| Hif1a      | 57.67      | 83.72      | <sup>a</sup> 6.80E-27  | 57.58      | 60.47      | 0.244                    |
| Atf4       | 210.72     | 372.88     | <sup>a</sup> 4.90E-95  | 284.00     | 260.00     | <sup>c</sup> 0.041       |
| Atf5       | 208.14     | 323.73     | <sup>a</sup> 8.20E-41  | 206.00     | 200.00     | 0.874                    |
| Gadd34     | 38.67      | 37.98      | 0.984                  | 42.72      | 32.51      | <sup>a</sup> 6.10E-4     |
| Nfe2l1     | 114.15     | 134.15     | <sup>a</sup> 3.20E-11  | 125.00     | 132.00     | 1                        |
| Nfe2l2     | 48.86      | 55.28      | <sup>c</sup> 0.01      | 44.20      | 45.36      | 0.896                    |
| Xbp1       | 65.86      | 90.53      | <sup>a</sup> 1.40E-13  | 59.30      | 84.20      | <sup>a</sup> 3.80E-14    |
| Chop/Ddit3 | 81.31      | 102.72     | <sup>b</sup> 0.001     | 82.09      | 74.59      | 0.791                    |
| Ddit4      | 40.07      | 62.39      | <sup>a</sup> 2.50E-14  | 44.70      | 56.20      | <sup>a</sup> 1.60E-4     |

P<sub>adj</sub> – the marks <sup>a</sup>, <sup>b</sup>, <sup>c</sup> are shown in Fig. 5 and 6

**Original unedited Western blot images (Figure 2S, 3S, 4S, 5S, 6S)**

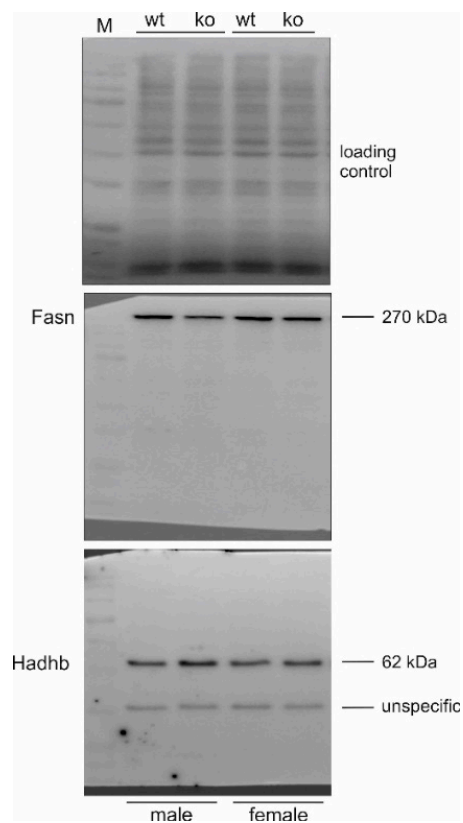

**Figure S2.** Western blot of Fasn and Hadhb in Sirt3 WT and Sirt3 KO MEF of both sexes. Amidoblack was used as a loading control; 20 micrograms of proteins per lane.

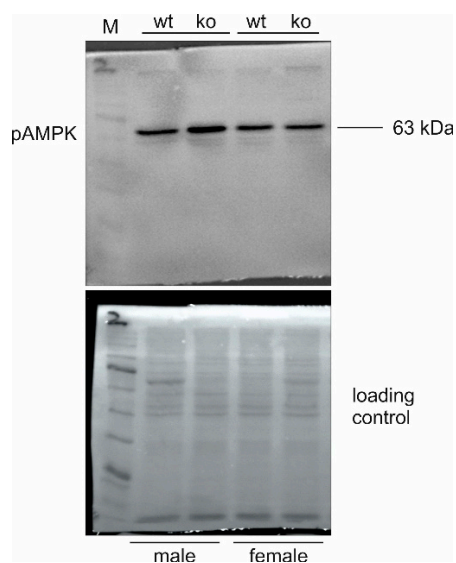

**Figure S3.** Western blot of pAMPK in Sirt3 WT and Sirt3 KO MEF of both sexes. Amidoblack was used as a loading control; 20 micrograms of proteins per lane.

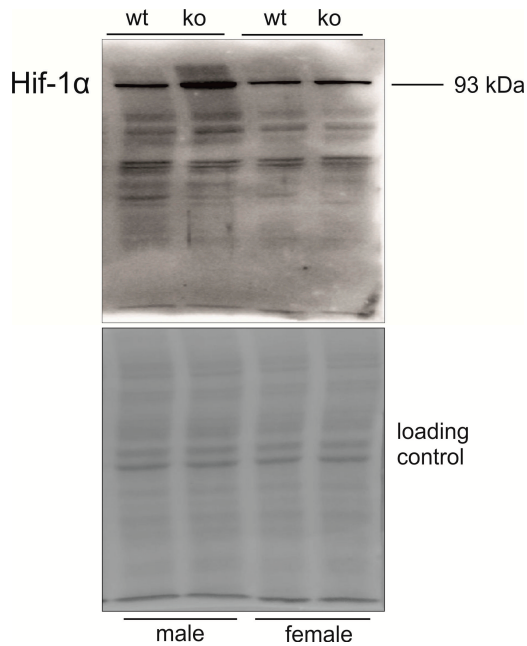

**Figure S4.** Western blot of Hif-1α in Sirt3 WT and Sirt3 KO MEF of both sexes. Amidoblack was used as a loading control; 20 micrograms of proteins per lane.

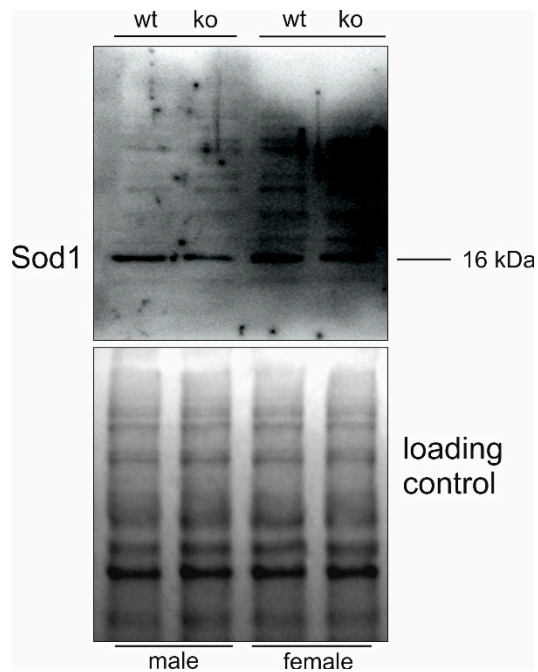

**Figure S5.** Western blot of Sod1 in Sirt3 WT and Sirt3 KO MEF of both sexes. Amidoblack was used as a loading control; 20 micrograms of proteins per lane.

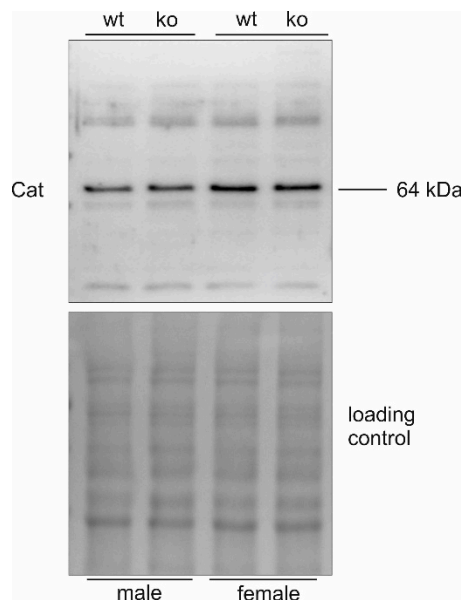

**Figure S6.** Western blot of Cat in Sirt3 WT and Sirt3 KO MEF of both sexes. Amidoblack was used as a loading control; 20 micrograms of proteins per lane.

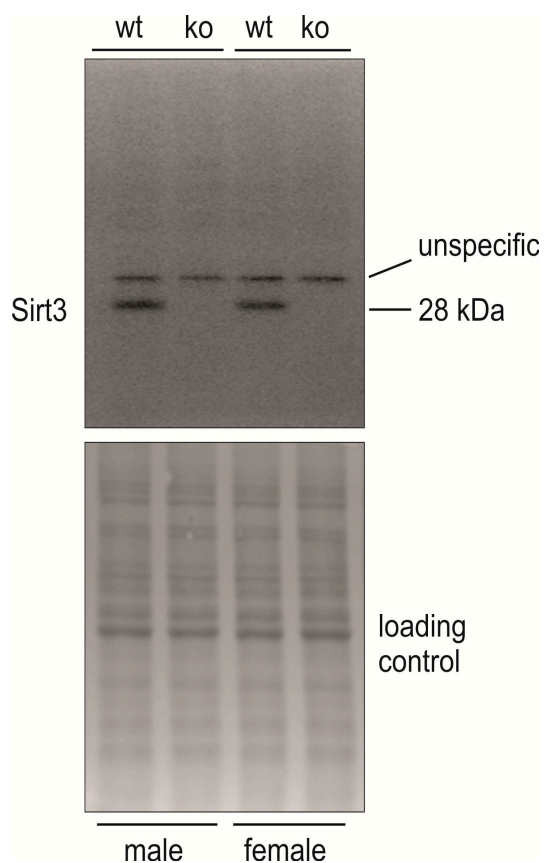

**Figure S7.** Western blot of Sirt in Sirt3 WT and Sirt3 KO MEF of both sexes. Amidoblack was used as a loading control; 20 micrograms of proteins per lane.

#### References:

1. Ge S.X.; Son, E.W.; Yao, R. iDEP: An integrated web application for differential expression and pathway analysis of RNA-Seq data. *BMC Bioinform.* **2018**, *19*, 534.
